# Supplementary material for: COVID-19: The Disease, the Immunological Challenges, the Treatment with Pharmaceuticals and Low-Dose Ionizing Radiation
Source: MDPI journal article supplement (doi:10.3390/cells10092212), 2021-08-27
Supplement: s1 [file s1]

**Table S1.** The development of COVID-19 vaccines in clinical trials (adjusted from WHO document) [1].

| ID | Vaccine platform description   | Type of candidate vaccine                                                                                                        | Dose number | Schedule                      | Route of administration | Developers                                                                                      | Phase |
|----|--------------------------------|----------------------------------------------------------------------------------------------------------------------------------|-------------|-------------------------------|-------------------------|-------------------------------------------------------------------------------------------------|-------|
| 1  | Inactivated virus              | CoronaVac; SARS-CoV-2 vaccine (inactivated)                                                                                      | 2           | Day 0 + 14                    | IM                      | Sinovac Research and Development Co., Ltd                                                       | 4     |
| 2  | Inactivated virus              | Inactivated SARS-CoV-2 vaccine (Vero cell)                                                                                       | 2           | Day 0 + 21                    | IM                      | Sinopharm + China National Biotech Group Co + Wuhan Institute of Biological Products            | 3     |
| 3  | Inactivated virus              | Inactivated SARS-CoV-2 vaccine (Vero cell), vaccine name BBIBP-CorV                                                              | 2           | Day 0 + 21                    | IM                      | Sinopharm + China National Biotech Group Co + Beijing Institute of Biological Products          | 3     |
| 4  | Viral vector (Non-replicating) | ChAdOx1-S - (AZD1222) (Covishield)                                                                                               | 1-2         | Day 0 + 28                    | IM                      | AstraZeneca + University of Oxford                                                              | 4     |
|    |                                |                                                                                                                                  | 1-2         | Day 0 + 28                    | IN                      | University of Oxford                                                                            | 1     |
| 5  | Viral vector (Non-replicating) | Recombinant novel coronavirus vaccine (Adenovirus type 5 vector)                                                                 | 1           | Day 0                         | IM                      | CanSino Biological Inc./Beijing Institute of Biotechnology                                      | 3     |
| 6  | Viral vector (Non-replicating) | Gam-COVID-Vac Adeno-based (rAd26-S+rAd5-S)                                                                                       | 2           | Day 0 + 21                    | IM                      | Gamaleya Research Institute ; Health Ministry of the Russian Federation                         | 3     |
| 7  | Viral vector (Non-replicating) | Ad26.COV2.S                                                                                                                      | 1-2         | Day 0 or Day 0 +56            | IM                      | Janssen Pharmaceutical                                                                          | 3     |
| 8  | Protein subunit                | SARS-CoV-2 rS/Matrix M1-Adjuvant (Full length recombinant SARS CoV-2 glycoprotein nanoparticle vaccine adjuvanted with Matrix M) | 2           | Day 0 + 21                    | IM                      | Novavax                                                                                         | 3     |
| 9  | RNA based vaccine              | mRNA -1273 mRNA-1283                                                                                                             | 2           | Day 0 + 28                    | IM                      | Moderna + National Institute of Allergy and Infectious Diseases (NIAID)                         | 4     |
| 10 | RNA based vaccine              | BNT162b2 (3 LNP-mRNAs ), also known as "Comirnaty"                                                                               | 2           | Day 0 + 21                    | IM                      | Pfizer/BioNTech + Fosun Pharma                                                                  | 4     |
| 11 | Protein subunit                | Recombinant SARS-CoV-2 vaccine (CHO Cell)                                                                                        | 2-3         | Day 0 + 28 or Day 0 + 28 + 56 | IM                      | Anhui Zhifei Longcom Biopharmaceutical + Institute of Microbiology, Chinese Academy of Sciences | 3     |
| 12 | RNA based vaccine              | CVnCoV Vaccine                                                                                                                   | 2           | Day 0 + 28                    | IM                      | CureVac AG                                                                                      | 3     |

|    |                                |                                                                                                              |          |                 |      |                                                                                                          |     |
|----|--------------------------------|--------------------------------------------------------------------------------------------------------------|----------|-----------------|------|----------------------------------------------------------------------------------------------------------|-----|
| 13 | Inactivated virus              | SARS-CoV-2 vaccine (vero cells)                                                                              | 2        | Day 0 + 28      | IM   | Institute of Medical Biology + Chinese Academy of Medical Sciences                                       | 3   |
| 14 | Inactivated virus              | QazCovid-in® - COVID-19 inactivated vaccine                                                                  | 2        | Day 0 + 21      | IM   | Research Institute for Biological Safety Problems, Rep of Kazakhstan                                     | 3   |
| 15 | DNA based vaccine              | INO-4800+electroporation                                                                                     | 2        | Day 0 + 28      | ID   | Inovio Pharmaceuticals + International Vaccine Institute + Advaccine (Suzhou) Biopharmaceutical Co., Ltd | 2/3 |
| 16 | DNA based vaccine              | AG0301-COVID19                                                                                               | 2        | Day 0 + 14      | IM   | AnGes + Takara Bio + Osaka University                                                                    | 2/3 |
| 17 | DNA based vaccine              | nCov vaccine                                                                                                 | 3        | Day 0 + 28 + 56 | ID   | Zyodus Cadila                                                                                            | 3   |
| 18 | DNA based vaccine              | GX-19N                                                                                                       | 2        | Day 0 + 28      | IM   | Genexine Consortium                                                                                      | 1/2 |
| 19 | Inactivated virus              | Whole-Virion Inactivated SARS-CoV-2 Vaccine (BBV152)                                                         | 2        | Day 0 + 14      | IM   | Bharat Biotech International Limited                                                                     | 3   |
| 20 | Protein subunit                | KBP-COVID-19 (RBD-based)                                                                                     | 2        | Day 0 + 21      | IM   | Kentucky Bioprocessing Inc.                                                                              | 1/2 |
| 21 | Protein subunit                | VAT00002: SARS-CoV-2 S protein with adjuvant                                                                 | 2        | Day 0 + 21      | IM   | Sanofi Pasteur + GSK                                                                                     | 3   |
| 22 | RNA based vaccine              | ARCT-021                                                                                                     | ND       | ND              | IM   | Arcturus Therapeutics                                                                                    | 2   |
| 23 | Virus like particle            | RBD SARS-CoV-2 HBsAg VLP vaccine                                                                             | 2        | Day 0 + 28      | IM   | Serum Institute of India + Accelagen Pty + SpyBiotech                                                    | 1/2 |
| 24 | Inactivated virus              | Inactivated SARS-CoV-2 vaccine (Vero cell)                                                                   | 1,2 or 3 | ND              | IM   | Beijing Minhai Biotechnology Co                                                                          | 3   |
| 25 | Viral vector (Non-replicating) | GRAd-COV2 (Replication defective Simian Adenovirus (GRAd) encoding S)                                        | 1        | Day 0           | IM   | ReiThera + Leukocare + Univercells                                                                       | 2/3 |
| 26 | Viral vector (Non-replicating) | VXA-CoV2-1 Ad5 adjuvanted Oral Vaccine platform                                                              | 2        | Day 0 + 28      | Oral | Vaxart                                                                                                   | 1   |
| 27 | Viral vector (Non-replicating) | MVA-SARS-2-S                                                                                                 | 2        | Day 0 + 28      | IM   | University of Munich (Ludwig-Maximilians)                                                                | 1   |
| 28 | Protein subunit                | SCB-2019 + AS03 or CpG 1018 adjuvant plus Alum adjuvant (Native like Trimeric subunit Spike Protein vaccine) | 2        | Day 0 + 21      | IM   | Clover Biopharmaceuticals Inc./GSK/Dynavax                                                               | 2/3 |
| 29 | Protein subunit                | COVAX-19® Recombinant spike protein + adjuvant                                                               | 1        | Day 0 + 21      | IM   | Vaxine Pty Ltd.                                                                                          | 1   |
| 30 | Protein subunit                | MVC-COV1901 (Spike-2P protein + adjuvant CpG 1018)                                                           | 2        | Day 0 + 28      | IM   | Medigen Vaccine Biologics + Dynavax + National Institute of Allergy and                                  | 2   |

| Infectious Diseases (NIAID) |                                      |                                                                                                                                                                                                           |   |                          |         |                                                                                                     |     |
|-----------------------------|--------------------------------------|-----------------------------------------------------------------------------------------------------------------------------------------------------------------------------------------------------------|---|--------------------------|---------|-----------------------------------------------------------------------------------------------------|-----|
| 31                          | Protein subunit                      | FINLAY-FR1 anti-SARS-CoV-2 Vaccine (RBD + adjuvant)                                                                                                                                                       | 2 | Day 0 + 28               | IM      | Instituto Finlay de Vacunas                                                                         | 1/2 |
| 32                          | Protein subunit                      | FINLAY-FR-2 anti-SARS-CoV-2 Vaccine (RBD chemically conjugated to tetanus toxoid plus adjuvant)                                                                                                           | 2 | Day 0 + 28               | IM      | Instituto Finlay de Vacunas                                                                         | 3   |
| 33                          | Protein subunit                      | EpiVacCorona (EpiVacCorona vaccine based on peptide antigens for the prevention of COVID-19)                                                                                                              | 2 | Day 0 + 21               | IM      | Federal Budgetary Research Institution State Research Center of Virology and Biotechnology "Vector" | 3   |
| 34                          | Protein subunit                      | RBD (baculovirus production expressed in Sf9 cells) Recombinant SARS-CoV-2 vaccine (Sf9 Cell)                                                                                                             | 2 | Day 0 + 28               | IM      | West China Hospital + Sichuan University                                                            | 2   |
| 35                          | Protein subunit                      | IMP CoVac-1 (SARS-CoV-2 HLA-DR peptides)                                                                                                                                                                  | 1 | Day 0                    | SC      | University Hospital Tuebingen                                                                       | 1   |
| 36                          | Protein subunit                      | UB-612 (Multitope peptide based S1-RBD-protein based vaccine)                                                                                                                                             | 2 | Day 0 + 28               | IM      | Vaxxinity                                                                                           | 3   |
| 37                          | Viral vector (Replicating)           | DeINS1-2019-nCoV-RBD-OPT1 (Intranasal flu-based-RBD )                                                                                                                                                     | 2 | Day 0 + 28               | IN      | University of Hong Kong, Xiamen University and Beijing Wantai Biological Pharmacy                   | 2   |
| 38                          | RNA based vaccine                    | LNP-nCoVsaRNA                                                                                                                                                                                             | 2 | ND                       | IM      | Imperial College London                                                                             | 1   |
| 39                          | RNA based vaccine                    | SARS-CoV-2 mRNA vaccine (ARCoV)                                                                                                                                                                           | 2 | Day 0 + 14 or Day 0 + 28 | IM      | Academy of Military Science (AMS), Walvax Biotechnology and Suzhou Abogen Biosciences               | 3   |
| 40                          | Virus like particle                  | Coronavirus-Like Particle COVID-19 (CoVLP)                                                                                                                                                                | 2 | Day 0 + 21               | IM      | Medicago Inc.                                                                                       | 2/3 |
| 41                          | Viral vector (Replicating) + APC     | Covid-19/aAPC vaccine. The Covid-19/aAPC vaccine is prepared by applying lentivirus modification with immune modulatory genes and the viral minigenes to the artificial antigen presenting cells (aAPCs). | 3 | Day 0 + 14 + 28          | SC      | Shenzhen Geno-Immune Medical Institute                                                              | 1   |
| 42                          | Viral vector (Non-replicating) + APC | LV-SMENP-DC vaccine. Dendritic cells are modified with lentivirus vectors                                                                                                                                 | 1 | Day 0                    | SC & IV | Shenzhen Geno-Immune Medical Institute                                                              | 1/2 |

|    |                                  |                                                                                                                                                     |     |                                    |            |                                                                                                                         |     |
|----|----------------------------------|-----------------------------------------------------------------------------------------------------------------------------------------------------|-----|------------------------------------|------------|-------------------------------------------------------------------------------------------------------------------------|-----|
|    |                                  | expressing Covid-19 minigene SMENP and immune modulatory genes. CTLs are activated by LV-DC presenting Covid-19 specific antigens.                  |     |                                    |            |                                                                                                                         |     |
| 43 | Protein subunit                  | AdimrSC-2f (recombinant RBD +/- Aluminium)                                                                                                          | ND  | ND                                 | ND         | Adimmune Corporation                                                                                                    | 1   |
| 44 | DNA based vaccine                | Covigenix VAX-001 - DNA vaccines + proteo-lipid vehicle (PLV) formulation                                                                           | 2   | Day 0 + 14                         | IM         | Entos Pharmaceuticals Inc.                                                                                              | 1   |
| 45 | DNA based vaccine                | CORVax - Spike (S) Protein Plasmid DNA Vaccine                                                                                                      | 2   | Day 0 + 14                         | ID         | Providence Health & Services                                                                                            | 1   |
| 46 | RNA based vaccine                | ChulaCov19 mRNA vaccine                                                                                                                             | 2   | Day 0 + 21                         | IM         | Chulalongkorn University                                                                                                | 1   |
| 47 | DNA based vaccine                | bacTRL-Spike oral DNA vaccine                                                                                                                       | 1   | Day 0                              | Oral       | Symvivo Corporation                                                                                                     | 1   |
| 48 | Viral vector (Non-replicating)   | Human Adenovirus Type 5: hAd5 S+N vaccine (S-Fusion + N-ETSD). E2b- Deleted Adeno.                                                                  | 1-2 | Day 0 + 21                         | SC or Oral | ImmunityBio, Inc                                                                                                        | 1/2 |
| 49 | Viral vector (Non-replicating)   | COH04S1 (MVA-SARS-2-S) - Modified vaccinia ankara (sMVA) platform + synthetic SARS-CoV-2                                                            | 1-2 | Day 0 + 28                         | IM         | City of Hope Medical Center + National Cancer Institute                                                                 | 1   |
| 50 | Viral vector (Replicating)       | rVSV-SARS-CoV-2-S Vaccine                                                                                                                           | 1   | Day 0                              | IM         | Israel Institute for Biological Research                                                                                | 1/2 |
| 51 | Viral vector (Replicating) + APC | Dendritic cell vaccine AV-COVID-19. A vaccine consisting of autologous dendritic cells loaded with antigens from SARS-CoV-2, with or without GM-CSF | 1   | Day 0                              | IM         | Aivita Biomedical, Inc. National Institute of Health Research and Development, Ministry of Health Republic of Indonesia | 1/2 |
| 52 | Live attenuated virus            | COVI-VAC                                                                                                                                            | 1-2 | Day 0 or Day 0 + 28                | IN         | Codagenix/Serum Institute of India                                                                                      | 1   |
| 53 | Protein subunit                  | CIGB-669 (RBD+AgnHB)                                                                                                                                | 3   | Day 0 + 14 + 28 or Day 0 + 28 + 56 | IN         | Center for Genetic Engineering and Biotechnology (CIGB)                                                                 | 1/2 |
| 54 | Protein subunit                  | CIGB-66 (RBD+aluminium hydroxide)                                                                                                                   | 3   | Day 0 + 14 + 28 or Day 0 + 28 + 56 | IM         | Center for Genetic Engineering and Biotechnology (CIGB)                                                                 | 3   |
| 55 | Inactivated Virus                | VLA2001                                                                                                                                             | 2   | Day 0 + 21                         | IM         | Valneva, National Institute for Health Research, United Kingdom                                                         | 1/2 |
| 56 | Protein subunit                  | BECOV2                                                                                                                                              | 2   | Day 0 + 28                         | IM         | Biological E. Limited                                                                                                   | 1/2 |

|    |                                |                                                                                                                |     |                          |                            |                                                               |     |
|----|--------------------------------|----------------------------------------------------------------------------------------------------------------|-----|--------------------------|----------------------------|---------------------------------------------------------------|-----|
| 57 | Viral vector (Replicating)     | AdCLD-CoV19 (adenovirus vector)                                                                                | 1   | Day 0                    | IM                         | Cellid Co., Ltd.                                              | 1/2 |
| 58 | DNA based vaccine              | GLS-5310                                                                                                       | 2   | Day 0 + 56 or Day 0 + 84 | ID                         | GeneOne Life Science, Inc.                                    | 1/2 |
| 59 | Protein subunit                | Recombinant Sars-CoV-2 Spike protein, Aluminum adjuvanted                                                      | 2   | Day 0 + 21               | IM                         | Nanogen Pharmaceutical Biotechnology                          | 1/2 |
| 60 | Protein subunit                | Recombinant protein vaccine S-268019 (using Baculovirus expression vector system)                              | 2   | Day 0 + 21               | IM                         | Shionogi                                                      | 1/2 |
| 61 | Viral vector (Non-replicating) | AdCOVID, Adenovirus-based platform expresses the receptor-binding domain (RBD) of the Sars-Cov-2 spike protein | 1-2 | Day 0                    | IN                         | Altimune, Inc.                                                | 1   |
| 62 | Protein subunit                | SARS-CoV-2-RBD-Fc fusion protein                                                                               |     |                          | SC or IM                   | University Medical Center Groningen + Akston Biosciences Inc. | 1/2 |
| 63 | Inactivated Virus              | ERUCOV-VAC, inactivated virus                                                                                  | 2   | Day 0 + 21               | IM                         | Erciyes University                                            | 2   |
| 64 | Protein subunit                | COVAC-1 and COVAC-2 sub-unit vaccine (spike protein) + SWE adjuvant                                            | 2   | Day 0 + 28               | IM                         | University of Saskatchewan                                    | 1/2 |
| 65 | Protein subunit                | GBP510, a recombinant surface protein vaccine with adjuvant AS03 (aluminium hydroxide)                         | 2   | Day 0 + 28               | IM                         | SK Bioscience Co., Ltd. and CEPI                              | 1/2 |
| 66 | Protein subunit                | Razi Cov Pars, recombinant spike protein                                                                       | 3   | Day 0 + 21 +51           | IM and IN                  | Razi Vaccine and Serum Research Institute                     | 2   |
| 67 | Inactivated Virus              | COVID-19 inactivated vaccine                                                                                   | 2   | Day 0 + 14               | IM                         | Shifa Pharmed Industrial Co                                   | 2/3 |
| 68 | Protein subunit                | MF59 adjuvanted SARS-CoV-2 Sclamp vaccine                                                                      | 2   | Day 0 + 28               | IM                         | The University of Queensland                                  | 1   |
| 69 | DNA based vaccine              | COVIGEN                                                                                                        | 2   | Day 0 + 28               | ID or IM                   | University of Sydney, Bionet Co., Ltd Technovalia             | 1   |
| 70 | DNA based vaccine              | COVID-eVax, a candidate plasmid DNA vaccine of the Spike protein                                               |     |                          | IM or IM + electroporation | Takis + Rottapharm Biotech                                    | 1/2 |
| 71 | Viral vector (Non-replicating) | BBV154, Adenoviral vector COVID-19 vaccine                                                                     | 1   | Day 0                    | IN                         | Bharat Biotech International Limited                          | 1   |
| 72 | RNA based vaccine              | PTX-COVID19-B, mRNA vaccine                                                                                    | 2   | Day 0 + 28               | IM                         | Providence Therapeutics                                       | 1   |
| 73 | Viral vector (Replicating)     | NDV-HXP-S, Newcastle disease virus (NDV) vector                                                                | 2   | Day 0 + 28               | IM                         | Mahidol University; The Government Pharmaceutical             | 1/2 |

|    |                                |                                                                                                                                                                             |     |                                                   |    |                                                                         |     |
|----|--------------------------------|-----------------------------------------------------------------------------------------------------------------------------------------------------------------------------|-----|---------------------------------------------------|----|-------------------------------------------------------------------------|-----|
|    |                                | expressing the spike protein of SARS-CoV-2, with or without the adjuvant CpG 1018                                                                                           |     |                                                   |    | Organization (GPO); Icahn School of Medicine at Mount Sinai             |     |
| 74 | RNA based vaccine              | CoV2 SAM (LNP) vaccine. A self-amplifying mRNA (SAM) lipid nanoparticle (LNP) platform + Spike antigen                                                                      |     | Day 0 + 28                                        | IM | GlaxoSmithKline                                                         | 1   |
| 75 | Virus like particle            | VBI-2902a. An enveloped virus-like particle (eVLP) of SARS-CoV-2 spike (S) glycoprotein and aluminum phosphate adjuvant.                                                    | 2   | Day 0 + 28                                        | IM | VBI Vaccines Inc.                                                       | 1/2 |
| 76 | Protein subunit                | SK SARS-CoV-2 recombinant surface antigen protein subunit (NBP2001) + adjuvanted with alum.                                                                                 | 2   | Day 0 + 28                                        | IM | SK Bioscience Co., Ltd.                                                 | 1   |
| 77 | Viral vector (Non-replicating) | Chimpanzee Adenovirus serotype 68 (ChAd) and self-amplifying mRNA (SAM) vectors expressing spike alone, or spike plus additional SARS-CoV-2 T cell epitopes.                | 2-3 | Day 0 + 14 + 28 or Day 0 + 28 + 56 or Day 0 + 112 | IM | Gritstone Oncology                                                      | 1   |
| 78 | RNA based vaccine              | mRNA-1273.351. A lipid nanoparticle (LNP)-encapsulated mRNA-based vaccine that encodes for a full-length, prefusion stabilized S protein of the SARS-CoV-2 B.1.351 variant. | 3   | Day 0 or Day 0 + 28 or Day 56                     | IM | Moderna + National Institute of Allergy and Infectious Diseases (NIAID) | 2   |
| 79 | Protein subunit                | SpFN (spike ferritin nanoparticle) uses spike proteins with a liposomal formulation QS21 (ALFQ) adjuvant.                                                                   | 2-3 | Day 0 + 28 + 180                                  | IM | Walter Reed Army Institute of Research (WRAIR)                          | 1   |
| 80 | Protein subunit                | EuCorVac-19; A spike protein using the recombinant protein technology and with an adjuvant.                                                                                 | 2   | Day 0 + 21                                        | IM | POP Biotechnologies and EuBiologics Co.,Ltd                             | 1/2 |
| 81 | Inactivated virus              | Inactivated SARS-CoV-2 vaccine FAKHRAVAC (MIVAC)                                                                                                                            | 2   | Day 0 + 14 +/- 21                                 | IM | Organization of Defensive Innovation and Research                       | 1   |
| 82 | Live attenuated virus          | MV-014-212, a live attenuated vaccine that                                                                                                                                  | 3   | Day 0 +/- 35                                      | IN | Meissa Vaccines, Inc.                                                   | 1   |

|    |                                |                                                                                                                                               |     |              |    |                                                                                                                  |     |
|----|--------------------------------|-----------------------------------------------------------------------------------------------------------------------------------------------|-----|--------------|----|------------------------------------------------------------------------------------------------------------------|-----|
|    |                                | expresses the spike (S) protein of SARS-CoV-2                                                                                                 |     |              |    |                                                                                                                  |     |
| 83 | RNA based vaccine              | MRT5500, an mRNA vaccine candidate                                                                                                            | 2   | Day 0 + 21   | IM | Sanofi Pasteur and Translate Bio                                                                                 | 1/2 |
| 84 | Virus like particle            | SARS-CoV-2 VLP Vaccine                                                                                                                        | 2   | Day 0        | SC | The Scientific and Technological Research Council of Turkey                                                      | 1   |
| 85 | Protein subunit                | ReCOV: Recombinant two-component spike and RBD protein COVID-19 vaccine (CHO cell).                                                           | 2   | Day 0 + 21   | IM | Jiangsu Rec-Biotechnology                                                                                        | 1   |
| 86 | RNA based vaccine              | DS-5670a, mRNA vaccine                                                                                                                        | 2   |              | IM | Daiichi Sankyo Co., Ltd.                                                                                         | 1/2 |
| 87 | Inactivated Virus              | Inactivated COVID-19 vaccine                                                                                                                  | 2   | Day 0 + 21   | IM | Kocak Farma                                                                                                      | 1   |
| 88 | Viral vector (Non-replicating) | COVIVAC. Newcastle Disease Virus (NDV) expressing membrane-anchored pre-fusion-stabilized trimeric SARS-CoV-2 S protein +/- adjuvant CpG 1018 | 2   | Day 0 + 28   | IM | Institute of Vaccines and Medical Biologicals, Vietnam                                                           | 1/2 |
| 89 | Viral vector (Non-replicating) | SC-Ad6-1, Adenoviral vector vaccine                                                                                                           | 1-2 | Day 0 +/- 21 | IM | Tetherex Pharmaceuticals Corporation                                                                             | 1   |
| 90 | Virus like particle            | ABNCoV2 capsid virus-like particle (cVLP) +/- adjuvant MF59                                                                                   | 2   | Day 0 + 28   | IM | Radboud University                                                                                               | 1   |
| 91 | Protein subunit                | Recombinant SARS-CoV-2 Fusion Protein Vaccine (V-01)                                                                                          | 2   | Day 0 + 21   | IM | Guangdong Provincial Center for Disease Control and Prevention/Gaozhou Center for Disease Control and Prevention | 2   |
| 92 | RNA based vaccine              | HDT-301: Self-replicating mRNA vaccine formulated as a lipid nanoparticle.                                                                    | 2   | Day 0 + 28   | IM | SENAI CIMATEC                                                                                                    | 1   |

IM: Intramuscular. IN: Intranasal. SC: Subcutaneous. ID: Intradermal.

#### Reference:

1. Organization, W.H., *Draft landscape and tracker of COVID-19 candidate vaccines*. 2021: who.int.
